# Supplementary material for: An innate contribution of human nicotinic receptor polymorphisms to COPD-like lesions
Source: PubMed Central journal article supplement (PMC8568944; doi:10.1038/s41467-021-26637-6), 2021-11-04
Supplement: 41467_2021_26637_MOESM1_ESM.pdf [file 41467_2021_26637_MOESM1_ESM.pdf]

**An innate contribution of human nicotinic receptor polymorphisms to Chronic Obstructive  
Pulmonary Disease-like lesions**

**Authors:** Julie Routhier<sup>1</sup>, Stéphanie Pons<sup>2</sup>, Mohamed Lamine Freidja<sup>1,3</sup>, Véronique Dalstein<sup>1,4</sup>, Jérôme Cutrona<sup>1</sup>, Antoine Jonquet<sup>1</sup>, Nathalie Lalun<sup>1</sup>, Jean-Claude Mérol<sup>1,5</sup>, Mark Lathrop<sup>6</sup>, Jerry A. Stitzel<sup>7</sup>, Gwenola Kervoaze<sup>8</sup>, Muriel Pichavant<sup>8</sup>, Philippe Gosset<sup>8</sup>, Jean-Marie Tournier<sup>1</sup>, Philippe Birembaut<sup>1,4,9</sup>, Valérian Dormoy<sup>1,9</sup>, Uwe Maskos<sup>2,9</sup>

**Supplemental Data**

| Variable           | Epithelial phenotype |                   |        |                            |                   |         |                   |                 |        |
|--------------------|----------------------|-------------------|--------|----------------------------|-------------------|---------|-------------------|-----------------|--------|
|                    | Inflammation         |                   |        | Secretory cell hyperplasia |                   |         | Normal epithelium |                 |        |
|                    | 0-1<br>n (%)         | 2-3<br>n (%)      | p      | < 10%<br>n (%)             | ≥ 10%<br>n (%)    | p       | < 50%<br>n (%)    | ≥ 50%<br>n (%)  | p      |
| Age                |                      |                   | 0.0394 |                            |                   | 0.7102  |                   |                 | 0.7334 |
| Mean ± SD          | 53.8±13.4<br>(50)    | 48.1±16.8<br>(50) |        | 51.8±14.7<br>(30)          | 50.6±15.7<br>(70) |         | 50.7±13.8<br>(72) | 51.7±19<br>(28) |        |
| Allergy/<br>Asthma |                      |                   | 0.123  |                            |                   | 0.261   |                   |                 | 0.086  |
| Yes (n=57)         | 33 (27)              | 24 (19)           |        | 20 (16)                    | 37 (30)           |         | 37 (30)           | 20 (16)         |        |
| No (n=66)          | 29 (24)              | 37 (30)           |        | 17 (14)                    | 49 (40)           |         | 52 (42)           | 14 (12)         |        |
| Genotype           |                      |                   | 0.003  |                            |                   | <0.0001 |                   |                 | 0.014  |
| WT (G/G)<br>(n=39) | 28 (23)              | 11 (9)            |        | 22 (18)                    | 17 (14)           |         | 22 (18)           | 17 (14)         |        |
| HT (G/A)<br>(n=59) | 26 (21)              | 33 (27)           |        | 12 (10)                    | 47 (38)           |         | 45 (36)           | 14 (12)         |        |
| HO (A/A)<br>(n=25) | 8 (6)                | 17 (14)           |        | 3 (2)                      | 22 (18)           |         | 22 (18)           | 3 (2)           |        |
| Gender             |                      |                   | 0.417  |                            |                   | 0.529   |                   |                 | 0.762  |
| Male<br>(n=75)     | 40 (33)              | 35 (28)           |        | 20 (16)                    | 37 (30)           |         | 55 (45)           | 20 (16)         |        |
| Female<br>(n=48)   | 22 (18)              | 26 (21)           |        | 17 (14)                    | 49 (40)           |         | 34 (27)           | 14 (12)         |        |

**Supplementary Table 1: Univariate analysis of the relationship between *CHRNA5* genotype and epithelial remodelling in human nasal polyps**

| Target                        | Manufacturer     | Catalog Nb  | Clone       | Lot Number  | Dilution      |
|-------------------------------|------------------|-------------|-------------|-------------|---------------|
| <b>Flow cytometry</b>         |                  |             |             |             |               |
| FITC-I-Ab                     | Miltenyi Biotech | 130-102-168 | M5/114.15.2 | 5161107010  | 1/200         |
| PE-F4/80                      | Miltenyi Biotech | 130-102-422 | REA126      | 5151203251  | 1/200         |
| PerCP Cy5.5 CD103             | BD Biosciences   | 563637      | M290        | 7104716     | 1/300         |
| PE-Cy7-CD11c                  | BD Biosciences   | 558079      | HL3         | 8083701     | 1/500         |
| APC-CCR2                      | R&D systems      | FAB5538A    | 475301      | ABLE0314121 | 1/200         |
| AF700-CD86                    | BD Biosciences   | 560581      | GL1         | 7034805     | 1/100         |
| APC-H7-Ly6G                   | BD Biosciences   | 560600      | 1A8         | 6263521     | 1/500         |
| V450-CD11b                    | BD Biosciences   | 560455      | M1/70       | 5322624     | 1/300         |
| V500-CD45                     | Miltenyi Biotech | 130-102-412 | 30F11       | 5150423227  | 1/300         |
| BV605-Ly6C                    | Biolegend        | 128036      | HK1.4       | B245767     | 1/300         |
| BV786-CD64                    | BD Biosciences   | 741024      | X54-5/7.1   | 7319699     | 1/500         |
| PE-CF594-SiglecF              | BD Biosciences   | 562757      | E50-2440    | 7128860     | 1/300         |
| FITC-CD5                      | Miltenyi Biotech | 130-102-574 | 53.7.3      | 5141118262  | 1/200         |
| Tetramer mCD1d 167ms          | NIH facility     | 30663       |             | 2016-06-26  | 1/500         |
| PerCP Cy5.5 NK1.1             | Miltenyi Biotech | 130-103-963 | PK136       | 5141202377  | 1/300         |
| PE-Cy7 CD4                    | Miltenyi Biotech | 130-102-411 | GK1.5       | 5150601111  | 1/500         |
| APC-CD25                      | Miltenyi Biotech | 130-102-550 | PC61        | 5141202369  | 1/200         |
| AF700-CD69                    | BD Biosciences   | 561238      | H12F3       | 7054759     | 1/500         |
| APC-Vio770 TCR $\gamma\delta$ | Miltenyi Biotech | 130-104-016 | GL3         | 5171122319  | 1/100         |
| V450-TCRb                     | Miltenyi Biotech | 130-104-815 | REA318      | 5171122321  | 1/100         |
| V500-CD8                      | BD Biosciences   | 130-109-252 | REA601      | 5161107165  | 1/500         |
| BV605CD45                     | Biolegend        | 103140      | 30F11       | B235438     | 1/300         |
| FITC IgG1                     | BD Biosciences   | 555749      | MOPC21      | 5225509     | 1/100         |
| IgG- isotype control          | Abcam            | ab37415     |             |             | 18 $\mu$ g/ml |
| NGFR                          | Abcam            | ab8875      |             |             | 18 $\mu$ g/ml |
| GFP                           | Invitrogen       | A-6455      |             |             | 1/750         |
| Goat anti-rabbit AF488        | Abcam            | ab150077    |             |             | 1/1000        |
| Goat anti-rabbit AF633        | Thermo Fisher Sc | A-21070     |             |             | 1/1000        |
| <b>Immunohistochemistry</b>   |                  |             |             |             |               |
| CC10                          | Abcam            | ab40873     |             | GR21852011  | 1/3200        |
| Acetylated tubulin            | Sigma-Aldrich    | T6793       | 6-11B-1     | 034M4828    | 1/1000        |
| GFP                           | Thermo Fisher Sc | A-6455      |             | 1826342     | 1/1000        |
| Adenylate cyclase-1           | Santa Cruz       | Sc-25743    |             | L1208       | 1 $\mu$ g/ml  |
| Adenylate cyclase-3           | Santa Cruz       | Sc-32114    |             | B1413       | 1 $\mu$ g/ml  |
| Adenylate cyclase-8           | Santa Cruz       | Sc-20764    |             | C1811       | 1 $\mu$ g/ml  |
| CK5                           | Abcam            | ab53121     |             |             | 5 $\mu$ g/ml  |
| Pan-cytokeratin               | Elabscience      | E-AB-33599  |             | DK9774      | 10 $\mu$ g/ml |
| CD45                          | Dako             | M0701       | 2B11+PD7/26 |             | 1/50          |
| CD68-KP1                      | Dako             | M0814       | KP1         |             | 1/400         |
| NGFR                          | Abcam            | ab8875      |             |             | 10 $\mu$ g/ml |
| IgG- isotype control          | Abcam            | ab37415     |             |             | 10 $\mu$ g/ml |
| Goat anti-rabbit AF488        | Molecular Probes | A11008      |             | 1885240     | 2 $\mu$ g/ml  |
| Donkey anti-rabbit AF488      | Molecular Probes | A21206      |             | 1796375     | 2 $\mu$ g/ml  |
| Goat anti-rabbit AF594        | Molecular Probes | A11012      |             | 1084427     | 2 $\mu$ g/ml  |
| Donkey anti-goat AF594        | Molecular Probes | A11058      |             | 1736986     | 2 $\mu$ g/ml  |
| <b>Immunoblotting</b>         |                  |             |             |             |               |
| Phospho-p65                   | Cell Signaling   | #3031       |             |             | 1/1000        |
| p65                           | Santa-Cruz       | Sc-372      |             |             | 1/1000        |
| Actin                         | Sigma-Aldrich    | A2066       |             |             | 1/1000        |

**Supplementary Table 2: Antibody panels for antigen presenting cells (APC) and lymphocyte labelling for flow cytometry, immunohistochemistry, and immunoblotting**

| Gene                 | Forward                        | Reverse                       |
|----------------------|--------------------------------|-------------------------------|
| <i>CHRNA5</i>        | 5'-CGCCTTTGGTCCGCAAGATA-3'     | 5'-TGCTGATGGGGGAAGTGGAG-3'    |
| <i>Hprt</i>          | 5'-ACATTGTGGCCCTCTGTGT-3'      | 5'-TGTAATCCAGCAGGTCAGCA-3'    |
| <i>NF-κBα</i>        | 5'-GAATTGCTGAGGCACTTCTGAA-3'   | 5'-GGGGTATTCCTCGAAAGTCTC-3'   |
| <i>Tgm-1</i>         | 5'-CCCCAGACCTTTCTCTTACGTTAC-3' | 5'-CTCCACATTCCTGACCAACA-3'    |
| <i>Trp63</i>         | 5'-TTTTGAAACTTCACGGGTGTGC-3'   | 5'-GAAACGCTGGATGTAAGGGTC-3'   |
| <i>Tnf-α</i>         | 5'-AGCACAGAAAGCATGATCCG-3'     | 5'-ACCCCGAAGTTCAGTAGACAG-3'   |
| <i>Il-1β</i>         | 5'-CCTGTGTTTTCTCCTTGCCCT-3'    | 5'-TCTCAGCTTCAATGAAAGACCTC-3' |
| <i>Il-6</i>          | 5'-GAGACTTCCATCCAGTTGCC-3'     | 5'-AAGTAGGGAAGGCCGTGGTT-3'    |
| <i>Adcy 1</i>        | 5'-ATATCCGAGAGAATCAAGCCT-3'    | 5'-GTCCACATCACAAAGACGACC-3'   |
| <i>Adcy 2</i>        | 5'-TCGATCTCCTCCCGCTCT-3'       | 5'-CATCATTCTGCTCCACCCCAT-3'   |
| <i>Adcy 3</i>        | 5'-TACCACTTTGCGGCTCACTC-3'     | 5'-GACATCATCCTTTTCGTGCTCT-3'  |
| <i>Adcy 6</i>        | 5'-GTGCCCCGTGTTCTTCGTCT-3'     | 5'-CCAGGCCAAAATCAAATGCAG-3'   |
| <i>Adcy 8</i>        | 5'-CATTTCTCAGGCCCAACAC-3'      | 5'-AGATCCAGAACGAAGCACGA-3'    |
| <i>Cyclophilin A</i> | 5'-CGTGGCCAACGATAAGAAGAA-3'    | 5'-GTCTCCACCCTGGATCATGAA-3'   |

**Supplementary Table 3: RT-PCR and PCR primers**

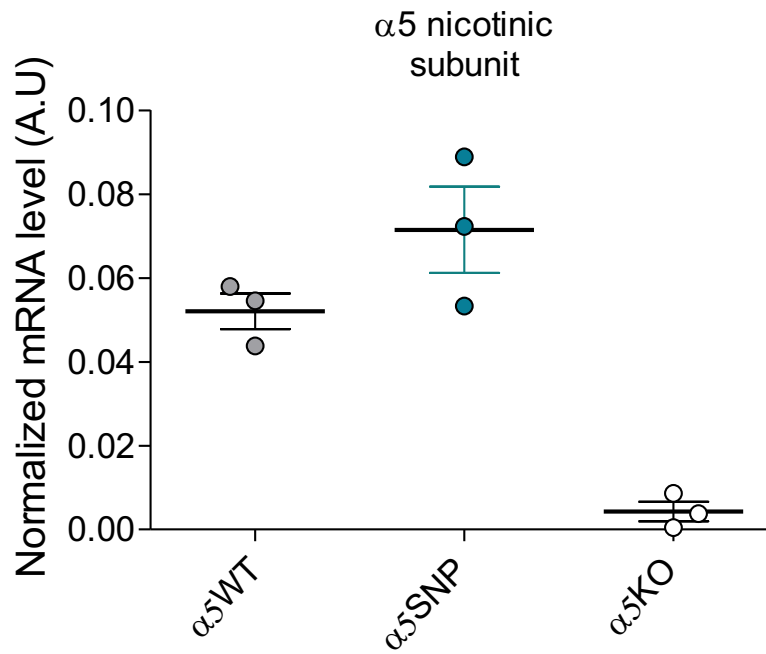

**Supplementary Figure 1: Gene expression levels of  $\alpha 5$  nAChR subunit in isolated epithelial basal cells from WT,  $\alpha 5$ SNP and KO mice.**

Total RNA was extracted from csBEC (6 mice) using a RNeasy mini kit (Qiagen, 74104). cDNA was synthesized with M-MLV reverse transcriptase (Invitrogen, 28025-013) and random hexamer primers (ThermoFisher, SO142). qPCR was carried out in a LightCycler 480 instrument (Roche Applied Science) using the KAPA SYBR FAST qPCR Master Mix (KapaBiosystems, KK4611) and specific primers detailed in **Table S3**. All reactions were run in duplicate, repeated 3 times and results were normalized to cyclophilin A expression. Data are expressed as mean  $\pm$  SEM.

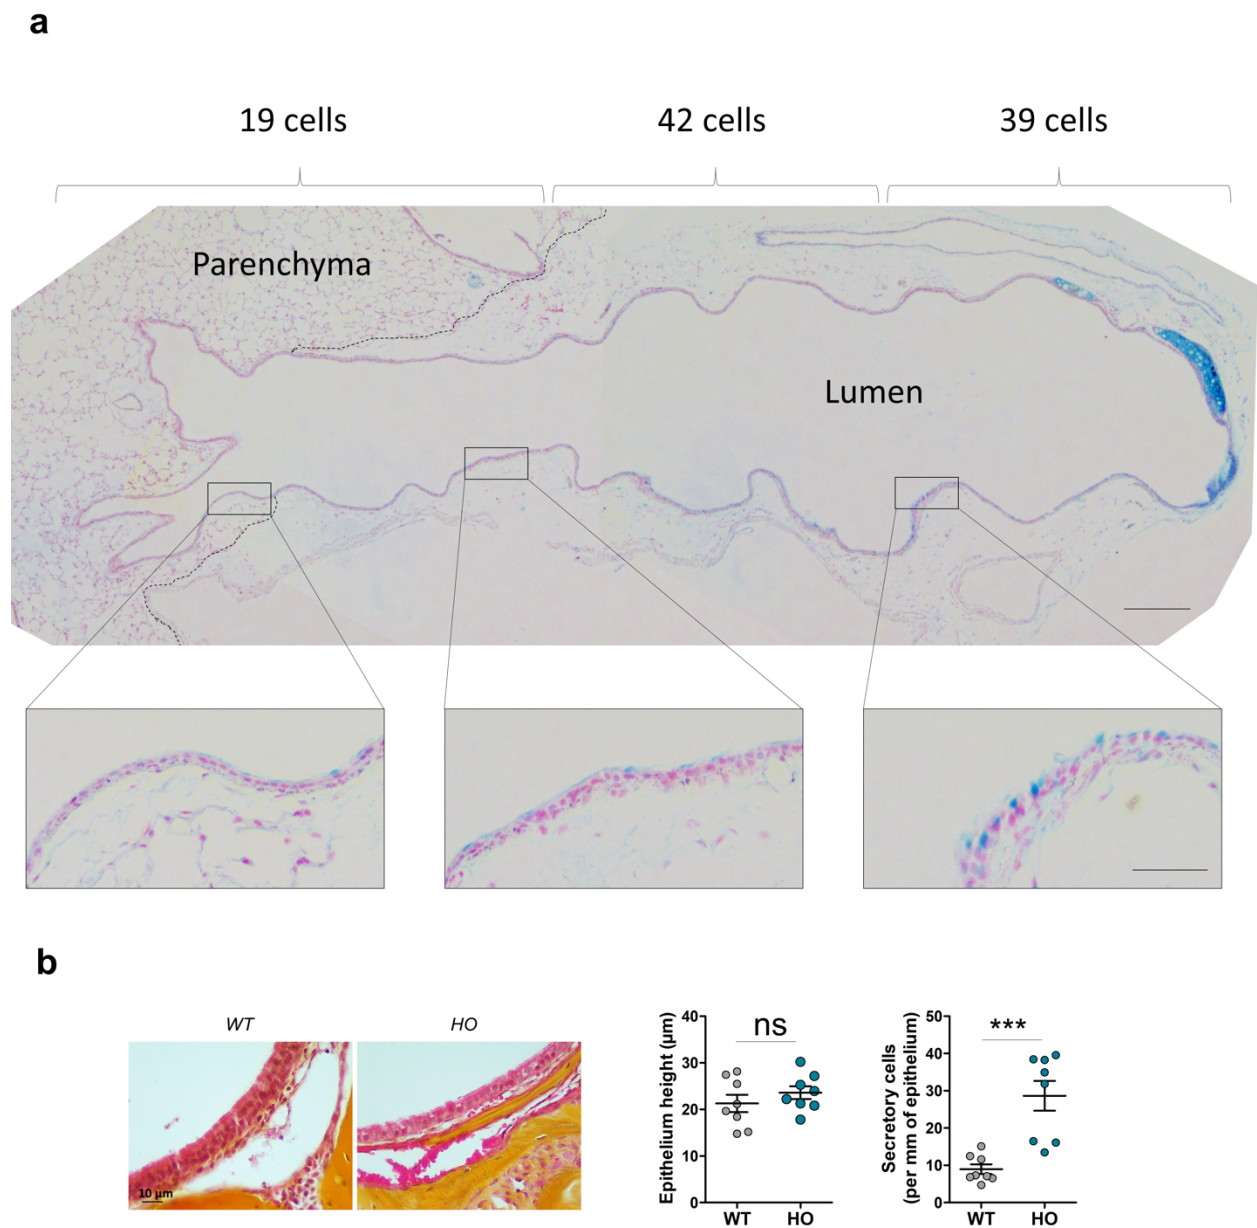

**Supplementary Figure 2: Distribution of goblet cells in respiratory epithelia of  $\alpha 5\text{SNP}$  HO mice.**

**a** Example of an Alcian blue staining of an extra-lobular bronchus in a 24 wo  $\alpha 5\text{SNP}$  HO mouse. The dotted line represents the limit of the lung. Quantification of Alcian blue-positive cells in the three areas shows a rapid decline of mucus cell numbers within the lung. Scale bars: main picture: 200  $\mu\text{m}$ ; magnification: 50  $\mu\text{m}$ . **b** Quantification of epithelium height and goblet cells in nasal respiratory epithelia of WT and HO  $\alpha 5\text{SNP}$  54 wo mice (n=8 mice per group). Data are expressed as mean  $\pm$  SEM. For statistical analyses, values are compared to WT mice. \*\*\* p<0.001, Mann-Whitney two-sided test.

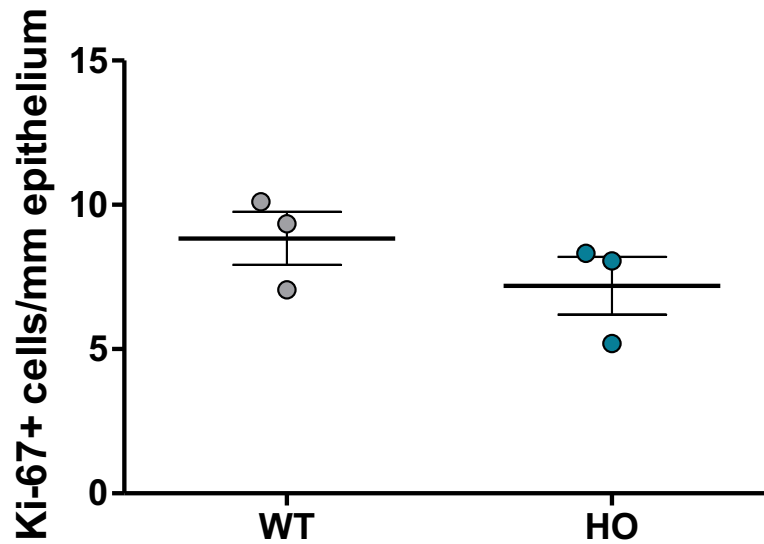

**Supplementary Figure 3:  $\alpha 5$ SNP does not alter cell proliferation in broncho-alveolar junctions.**

Quantification of Ki-67+ cells in broncho-alveolar junctions for  $\alpha 5$ SNP HO (n=3) and WT mice (n=3). Box plots show the medians and whiskers correspond to maximal and minimal values. For statistical analyses, values are compared to the appropriate control (WT). Data are expressed as mean  $\pm$  SEM. For statistical analyses, values are compared to WT mice.

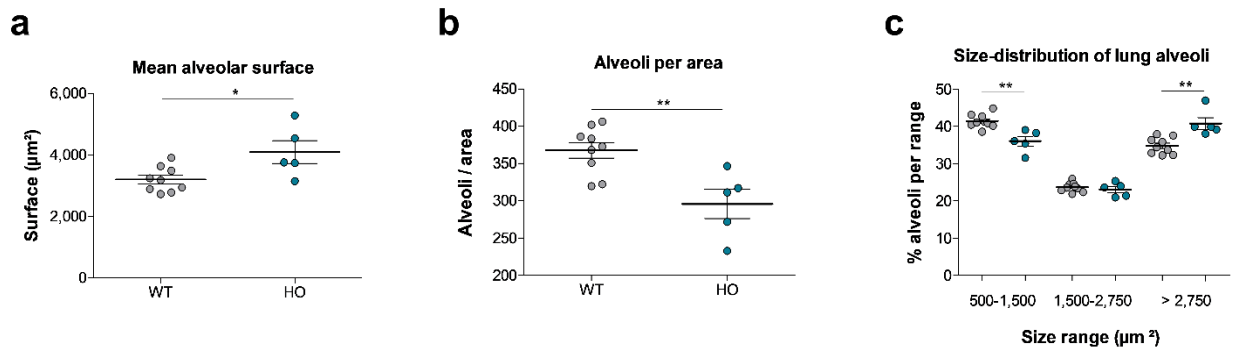

**Supplementary Figure 4: More severe emphysematous lung lesion in  $\alpha 5$ SNP HO mice confirmed by image analysis.**

Spontaneous emphysema in 54 wo HO  $\alpha 5$ SNP mice was confirmed by measuring the mean alveolar surface **a**, the mean number of alveoli per area **b**, and the percentage of alveoli in each class of alveolus surface of 500-1500  $\mu\text{m}^2$ , 1500-2750  $\mu\text{m}^2$  and more than 2750  $\mu\text{m}^2$  **c** (n=9 WT and 5 HO). In **a-c**, dot plots show the means  $\pm$  SEM. \* p< 0.05; \*\* p< 0.01, Mann-Whitney two-sided test.



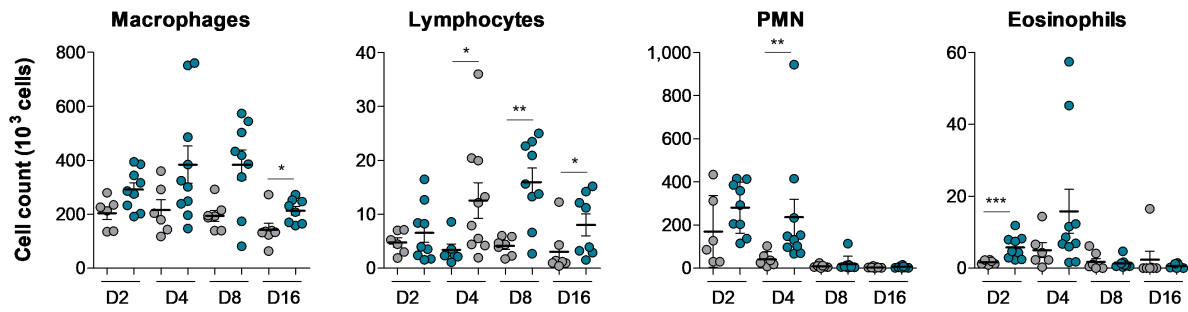

**Supplementary Figure 5: Inflammatory cell recruitment is increased in  $\alpha 5$ SNP HO mice after oxidative stress.**

Evolution of macrophages, lymphocytes, polymorphonuclear (PMN) cells and eosinophils in BALF from HO  $\alpha 5$ SNP and WT 12 wo females, at 2 days (D2), D4, D8 and D16 after instillation of a polidocanol solution (n=6 WT, grey circles and 9 HO, blue circles per time points). Data are expressed as mean  $\pm$  SEM. For statistical analyses, values are compared to the WT mice for the same day. \* p < 0.05; \*\* p < 0.01; \*\*\* p < 0.001 (Mann Whitney two-sided test).

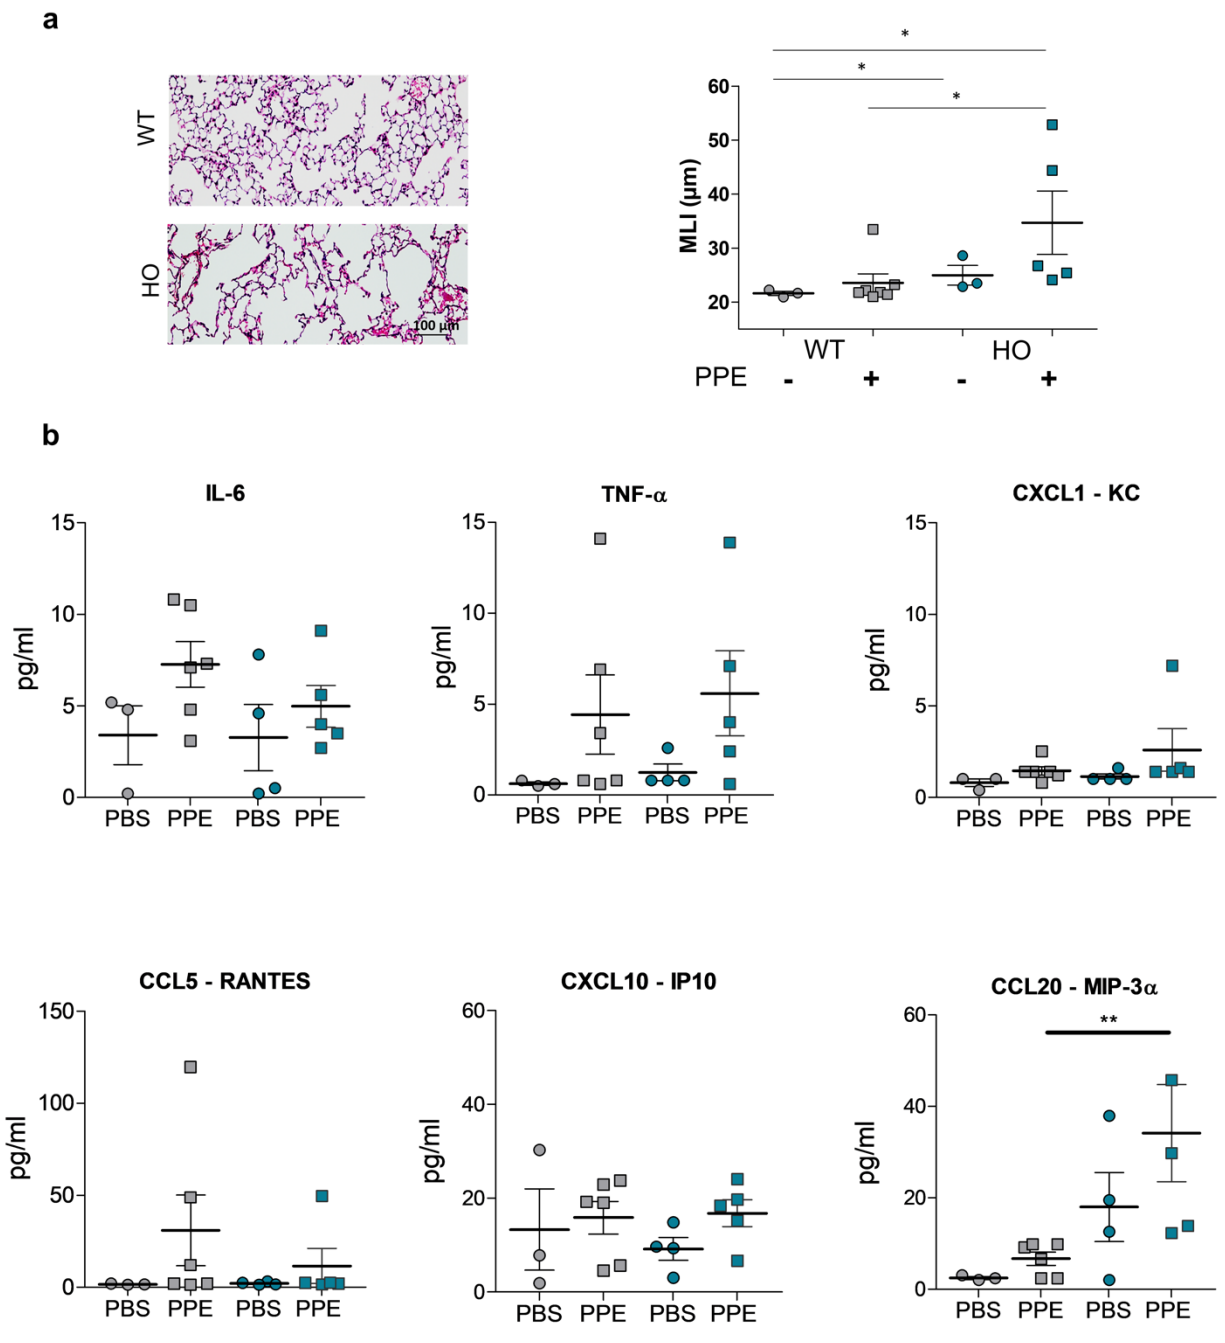

**Supplementary Figure 6: Evaluation of porcine pancreatic elastase (PPE)-induced emphysema and inflammation in WT and  $\alpha$ 5SNP mice.**

**a** Quantification of MLI after instillation of either PBS or PPE (n=10 WT and 8 HO). **b** Expression of cytokines IL-6, TNF- $\alpha$ , CXCL1, CCL5, CXCL10 and CCL20 in BALF from WT (grey, n=9) and  $\alpha$ 5SNP HO (blue, n=9) mice treated with PPE (squares) or PBS (circles). Data are expressed

as mean  $\pm$  SEM. For statistical analyses, values are compared to WT mice. \* $p < 0.05$ ; \*\*  $p < 0.01$   
(Mann-Whitney two-sided test).

**a**

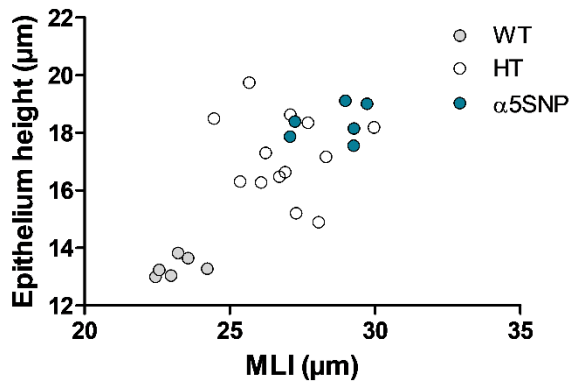

**b**

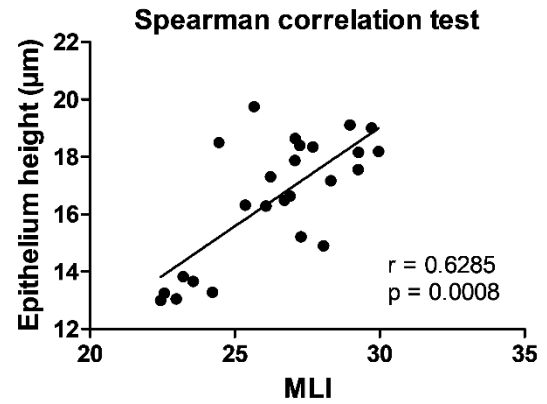

**Supplementary Figure 7: Correlation between emphysema and bronchiolo-alveolar epithelium height after an oxidative stress in WT and HT and HO  $\alpha\text{SNP}$  mice.**

**a** Emphysematous lesions in cumene exposed mice were assessed by MLI measurement, and epithelium height was also determined at bronchiolo-alveolar junctions as shown in **Fig. 3a** and **b**.

**b** Spearman correlation two-sided test showing a positive correlation between emphysema and epithelial height.

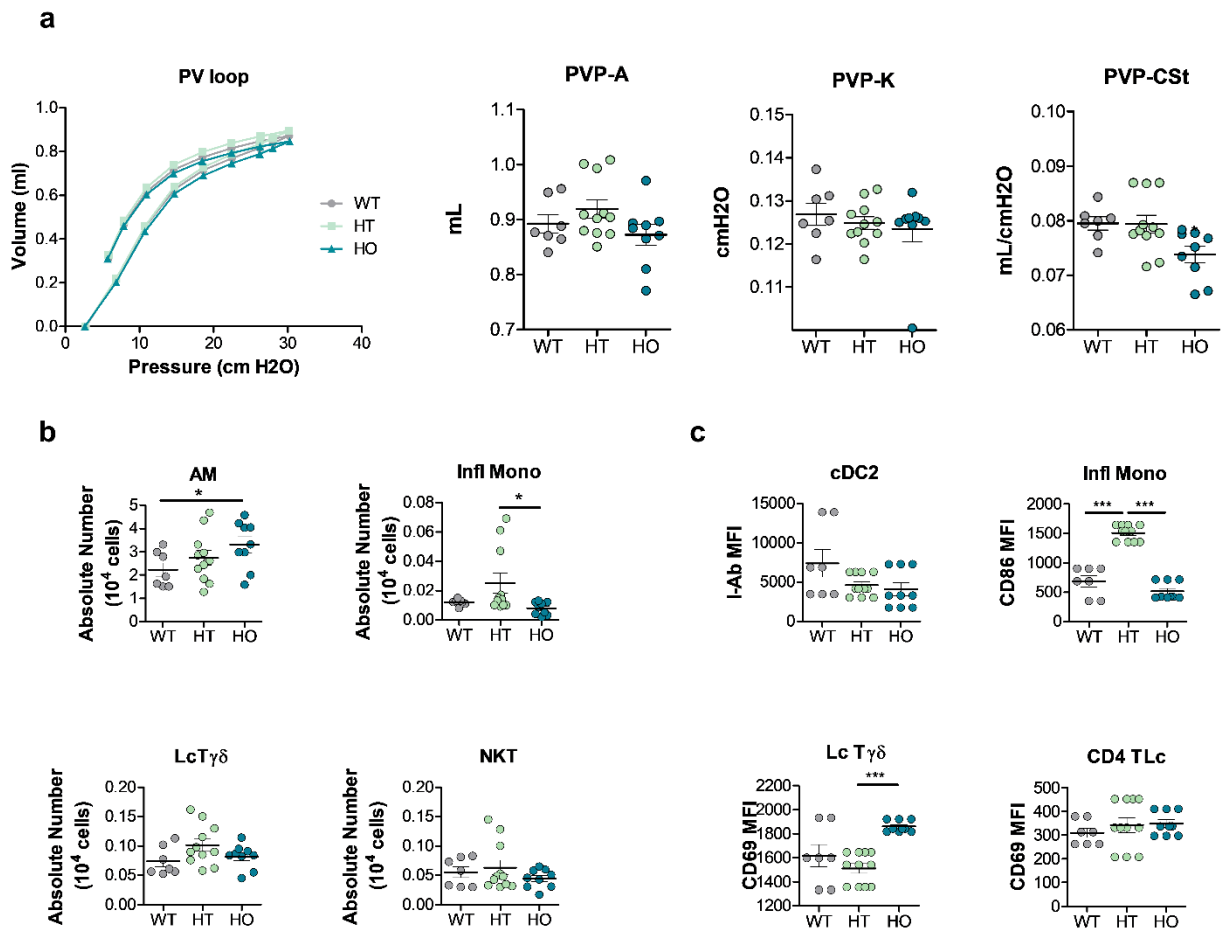

**Supplementary Figure 8: Basal respiratory function and inflammatory cells in BALF of WT and HT and HO  $\alpha$ 5SNP mice.**

**a** Basal lung function in WT (n=7) grey circles, HT (n=11) green circles and HO (n=9) blue circles,  $\alpha$ 5SNP mice nasally instilled with PBS 7, 5 and 3 days before analysis. Parameters A and K and Cst expressed as mean  $\pm$  SEM. The number of alveolar macrophages (CD11c<sup>+</sup>, F4-80<sup>+</sup>, Siglec F<sup>+</sup>), inflammatory monocytes (CD11c<sup>-</sup>, F4-80<sup>+</sup>, Ly-6C<sup>+</sup>, CCR2<sup>+</sup>, CD64<sup>+</sup>), T $\gamma\delta$  lymphocytes (CD5<sup>+</sup>, TCR $\gamma\delta$ <sup>+</sup>) and NKT cells (CD5<sup>+</sup>, TCR $\beta$ <sup>+</sup>, CD1d tetramer<sup>+</sup>) was measured in BALF by flow cytometry in **b**, and activation of cDc2 cells (I-Ab MFI), inflammatory monocytes (CD86 MFI), T $\gamma\delta$  lymphocytes and CD4<sup>+</sup> T cells (CD69 MFI) was determined in **c**. In a-c, dot plots show the means  $\pm$  SEM. \* p< 0.05; \*\* p< 0.01 (Mann-Whitney two-sided test).

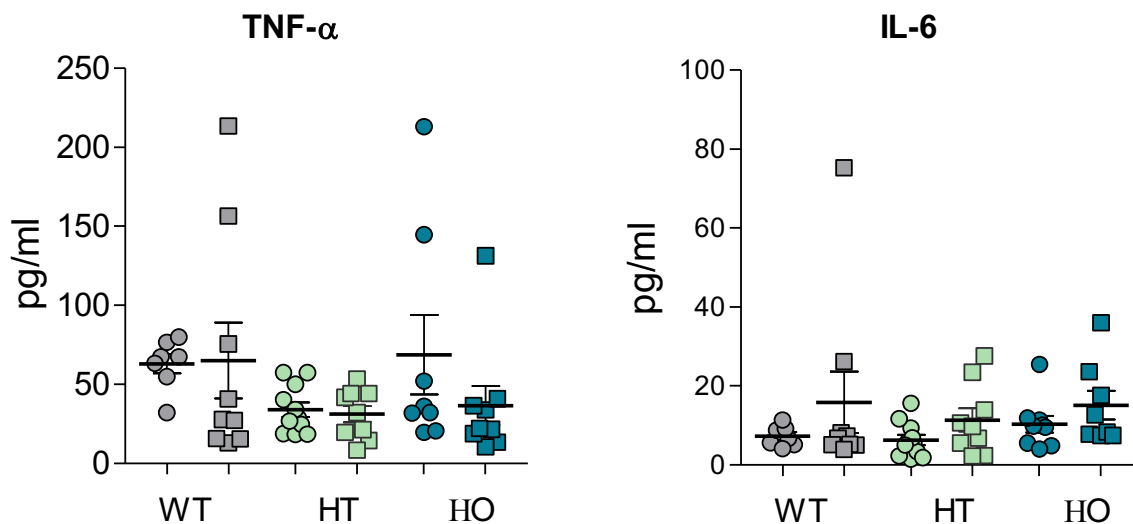

**Supplementary Figure 9: Cytokine concentrations after an oxidative stress in WT, HT and HO  $\alpha$ 5SNP mice.**

IL-6 and TNF- $\alpha$  concentrations in the BAL from WT (n=16), heterozygous (HT) (n=20) and homozygous (HO) (n=18)  $\alpha$ 5SNP mice exposed to cumene hydroperoxide-induced oxidative stress (squares) or to PBS (circles). Data are expressed as mean  $\pm$  SEM.

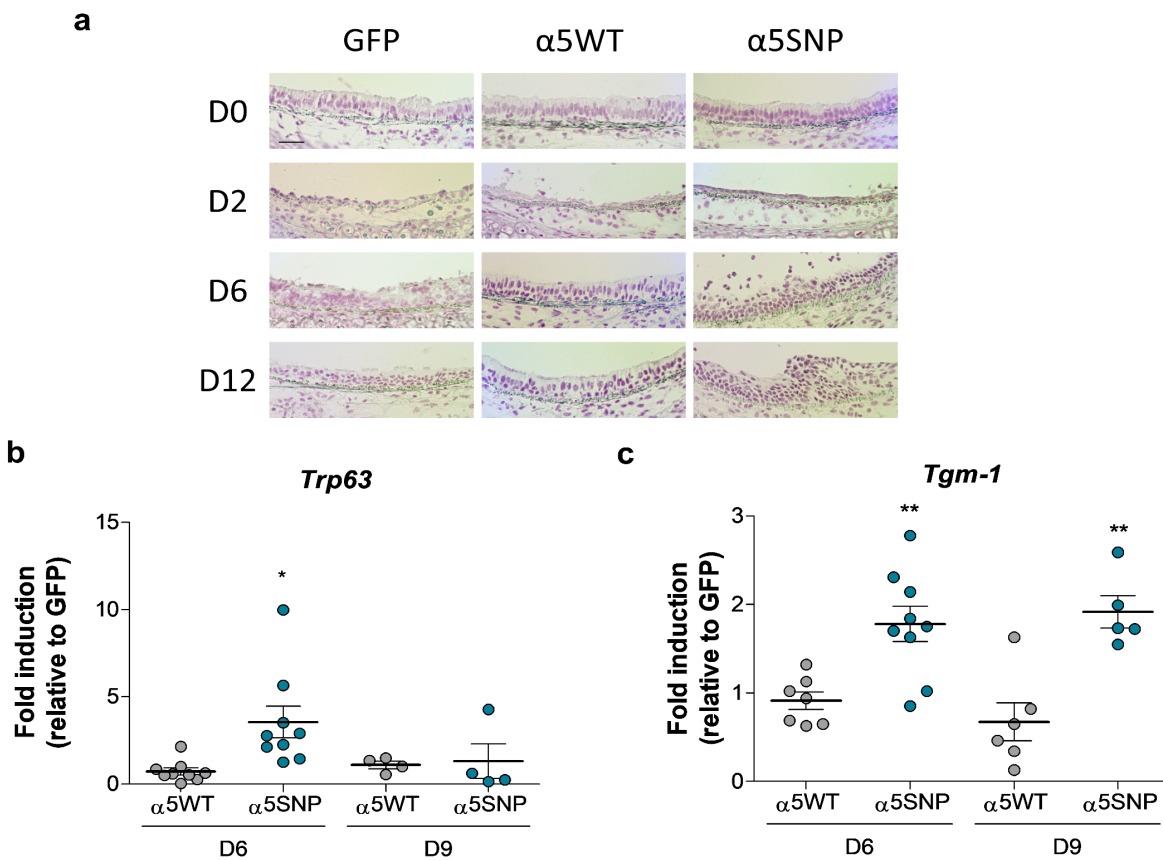

**Supplementary Figure 10: Effect of *Chrna5* genotype on epithelium morphology during repair, and on squamous metaplasia marker expression.**

**a** Kinetics of epithelial regeneration after a polidocanol lesion in GFP, α5WT or α5SNP LV mice. Micrographs representative from three experiments (Scale bar=20 μm). **b** Expression of squamous metaplasia marker *Trp63* in tracheas on D6 (n=9 mice in each group) and D9 (n=4 mice in each group) of epithelial repair. **c** Expression of squamous metaplasia marker *Tgm-1* in tracheas on D6 (n=7 α5WT and n=9 α5SNP LV mice) and D9 (n=6 α5WT and n=5 α5SNP LV mice) of epithelial repair. Results are presented as mean ± SEM of tracheal mRNA expression related to GFP control mice and values for α5SNP mice were compared to α5WT with \*p < 0.05; \*\*p < 0.01, Mann-Whitney two-sided test.

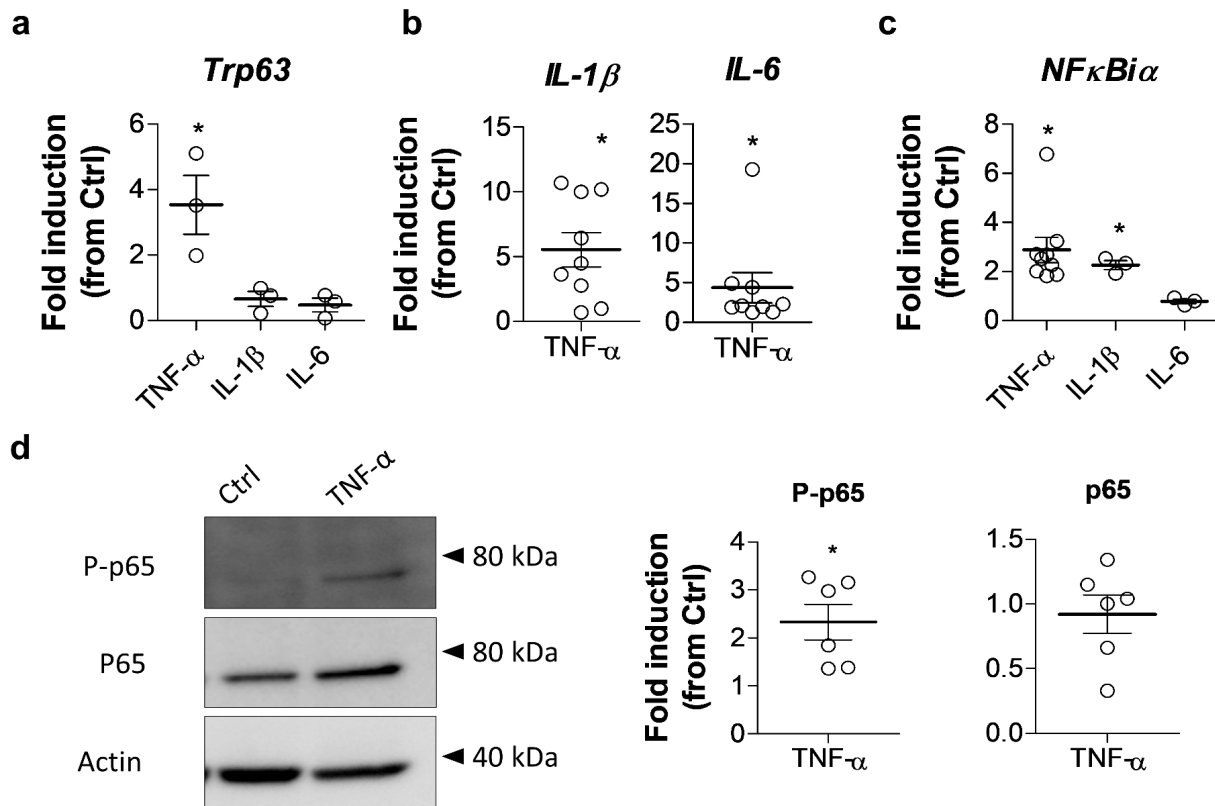

**Supplementary Figure 11: Effect of *Chrna5* genotype on epithelium morphology during repair, and on squamous metaplasia marker expression.**

**a** Kinetics of epithelial regeneration after a polidocanol lesion in GFP,  $\alpha$ 5WT or  $\alpha$ 5SNP LV mice. Micrographs representative from three experiments (Scale bar=20  $\mu$ m). **b** Expression of squamous metaplasia marker *Trp63* in tracheas on D6 (n=9 mice in each group) and D9 (n=4 mice in each group) of epithelial repair. **c** Expression of squamous metaplasia marker *Tgm-1* in tracheas on D6 (n=7  $\alpha$ 5WT and n=9  $\alpha$ 5SNP LV mice) and D9 (n=6  $\alpha$ 5WT and n=5  $\alpha$ 5SNP LV mice) of epithelial repair. Results are presented as mean  $\pm$  SEM of tracheal mRNA expression related to GFP control mice and values for  $\alpha$ 5SNP mice were compared to  $\alpha$ 5WT with \*p < 0.05; \*\*p < 0.01, Mann-Whitney two-sided test.



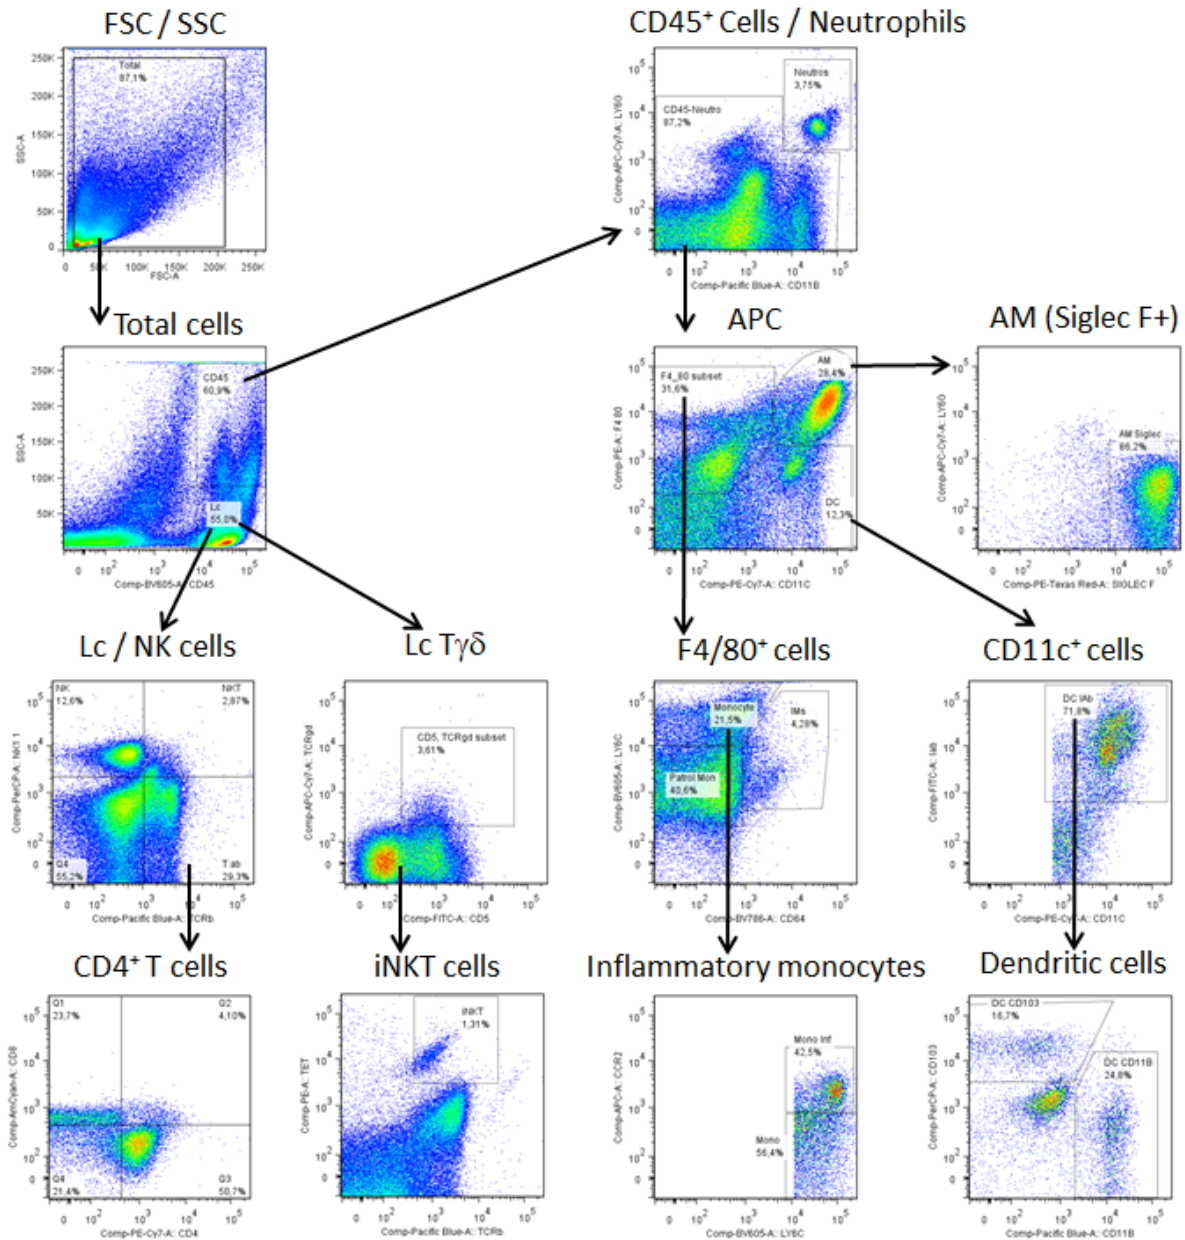

**Supplementary Figure 12: gating strategy for neutrophils, antigen-presenting cells (APC) and the major populations of lymphocytes (Lc) in the lung.**

The percentages of natural killer (NK), invariant NKT cells (iNKT) and T Lc with a TCRgd was determined. Among APC, we identified alveolar macrophages (AM), inflammatory monocytes,

patrolling monocytes, interstitial macrophages (IM) and conventional dendritic cells (cDC)1 and 2 as CD103+ and CD11b+ cells, respectively.

**a**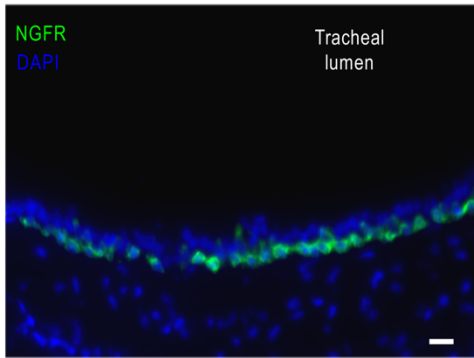**b**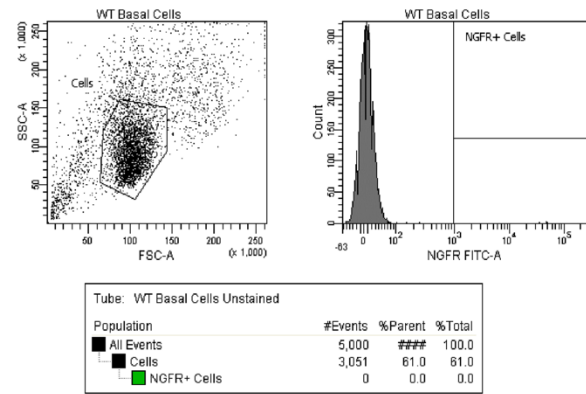**c**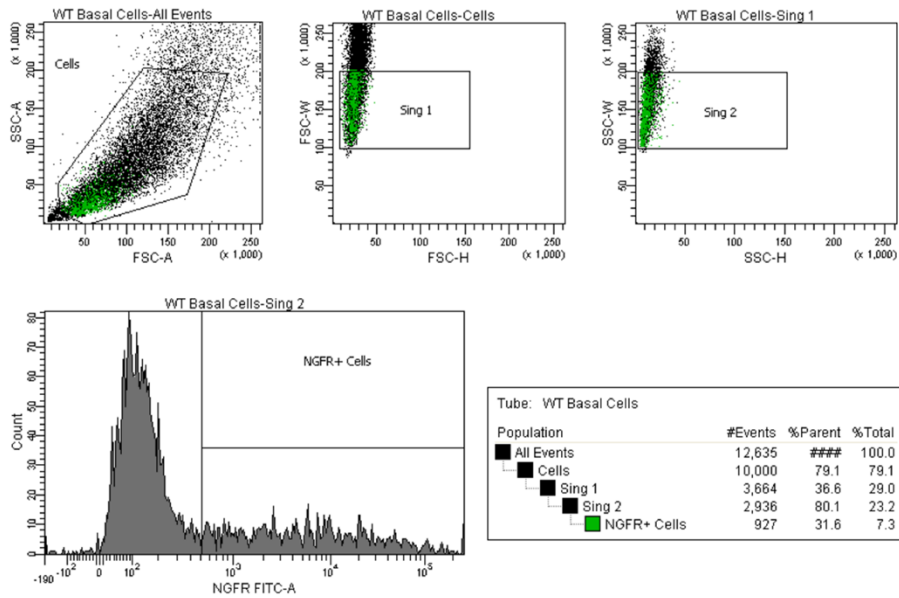**d**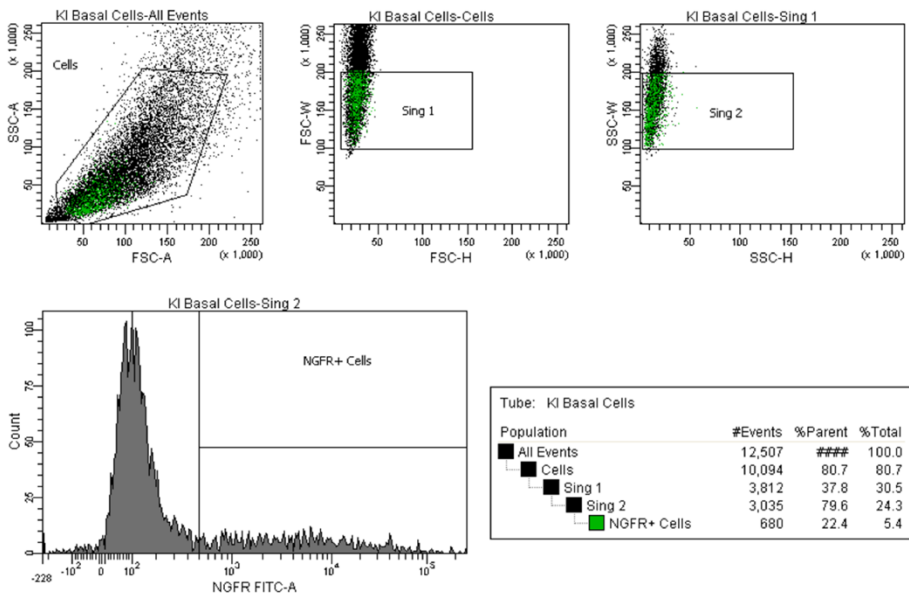

**Supplementary Figure 13: Flow cytometric analyses (FACS) and sorting of mouse tracheal basal epithelial cells.**

Flow cytometric analyses (FACS) and sorting of mouse tracheal basal epithelial cells. This figure presents immunohistostaining (**a** Scale bar = 20  $\mu\text{m}$ ) and FACS **b** data that support NGFR as a surface marker of airway basal cells in WT **c** and  $\alpha 5\text{SNP}$  HO **d** mice.

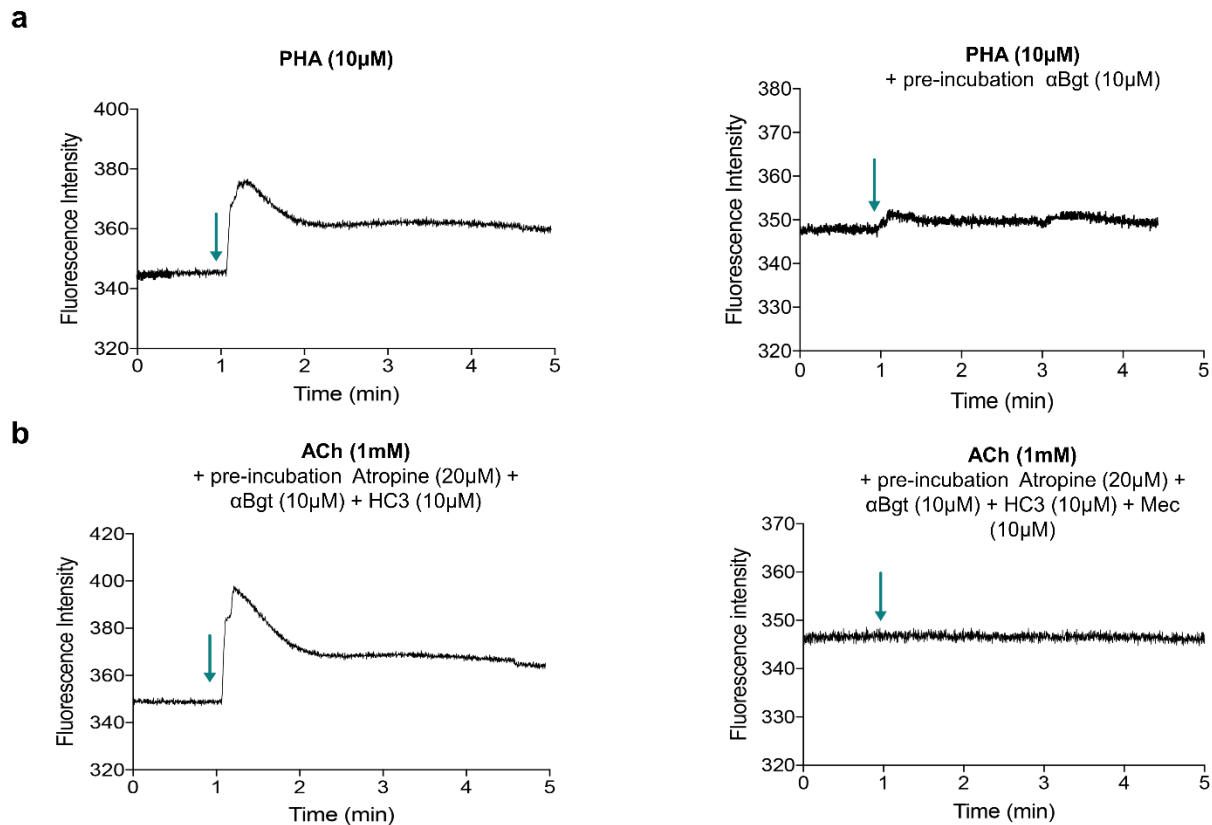

**Supplementary Figure 14: Control conditions for calcium imaging on csBEC from LV mice.**

Airway basal cells express  $\alpha 7$  nAChRs and muscarinic receptors (mAChRs). **a** Validation of blocking condition of  $\alpha 7$  nAChR: Measurement of fluorescence intensity representing  $\text{Ca}^{2+}$  entry in response to an application of 10 $\mu\text{M}$  PHA 568487<sup>2</sup> ( $\alpha 7$  nAChR selective agonist), green arrow, in basal cells without pre-incubation (left panel). Response blocked by 10 $\mu\text{M}$   $\alpha$ -Bungarotoxin ( $\alpha$ Bgt,  $\alpha 7$  nAChR antagonist) pre-incubation of basal cells (right panel). **b** Validation of condition to measure fluorescence intensity representing  $\text{Ca}^{2+}$  entry only due to heteropentameric nAChR, in response to an application of 1mM ACh, green arrow. In csBCE pre-incubated in presence of 10 $\mu\text{M}$   $\alpha$ Bgt, 20 $\mu\text{M}$  atropine and 10 $\mu\text{M}$  hemicholinium3 (HC3) to block  $\alpha 7$  nAChR, mAChRs and

the uptake of choline (right panel). Response blocked by addition of 10 $\mu$ M mecamylamine, a non-competitive nAChR antagonist<sup>3</sup>, during pre-incubation (right panel).

## Supplemental references

1. Lesage, J. *et al.* Zonula occludens-1 / NF- $\kappa$ B / CXCL8 : a new regulatory axis for tumor angiogenesis. *FASEB J.* **31**, 1678–1688 (2018).
2. Walker, D. P. *et al.* Design, synthesis, structure-activity relationship, and in vivo activity of azabicyclic aryl amides as  $\alpha 7$  nicotinic acetylcholine receptor agonists. *Bioorganic Med. Chem.* **14**, 8219–8248 (2006).
3. Bacher, I., Wu, B., Shytle, D. R. & George, T. P. Mecamylamine – a nicotinic acetylcholine receptor antagonist with potential for the treatment of neuropsychiatric disorders. *Expert Opin. Pharmacother.* **10**, 2709–2721 (2009).
